# Supplementary material for: Assessing policy coherence for developing a blue economy: a case study in the Republic of Panama
Source: Frontiers journal article supplement (doi:10.3389/fmars.2024.1336030), 2024-04-18
Supplement: Table_1.docx [file Table_1.docx]

**Supplementary Material**

**Supplementary Table 1.**

Inventory of Panamanian Policy Instruments.

| **Policy Instrument Name** | **Sector** |
| --- | --- |
| Law #37 of June 10th, 2013 | Energy |
| Law #43 of April 25th, 2011 | Energy |
| Law #44 of April 25th, 2011 | Energy |
| Law #69 of October 12th, 2012 | Energy |
| Strategic Guidelines – Energy Transition Agenda 2020-2030 (Cabinet Resolution #96 of November 24th, 2020) | Energy |
| National Energy Plan 2015-2050 (Cabinet Resolution #34 of March 29th, 2016) | Energy |
| Law #39 of August 14th, 2007 | Energy |
| Law #6 of January 11th, 2007 | Energy |
| Regional Agreement on the Access to Information, Public Participation, and Access to Justice for Environmental Affairs in Latin America and the Caribbean (Escazú Agreement) (Law #125 of February 4th, 2020) | Environment & Conservation |
| Cooperation Agreement for the Protection and Sustainable Development of Marine and Coastal Zones of the Northeastern Pacific (Law #28 of March 26th, 2003) | Environment & Conservation |
| Law #13 of May 5th, 2005 | Environment & Conservation |
| Law #187 of December 2nd, 2020 | Environment & Conservation |
| Law #18 of May 31st, 2007 | Environment & Conservation |
| Law #1 of January 19th, 2018 | Environment & Conservation |
| Law #209 of April 22, 2021 | Environment & Conservation |
| Law #223 of June 8th, 2021 | Environment & Conservation |
| Law #24 of June 7th, 1995 | Environment & Conservation |
| Law #36 of May 17th, 1996 | Environment & Conservation |
| Law #38 of December 2nd, 2014 | Environment & Conservation |
| Law #41 of July 1st, 1998 | Environment & Conservation |
| Law #44 of July 26th, 2004 | Environment & Conservation |
| Law #44 of August 5th, 2002 | Environment & Conservation |
| Law #5 of January 28th, 2005 | Environment & Conservation |
| Law #8 of March 25th, 2015 | Environment & Conservation |
| National Biodiversity Policy (Executive Decree #122 of December 23rd, 2008) | Environment & Conservation |
| National Policy on Environmental Management Decentralization (Executive Decree #82 of April 9th, 2007) | Environment & Conservation |
| National Wetlands Policy (Executive Decree #127 of December 18th, 2018) | Environment & Conservation |
| National Policy on Environmental Information (Executive Decree #83 of April 9th, 2007) | Environment & Conservation |
| National Policy on Cleaner Production (Executive Decree #36 of March 1st, 2007) | Environment & Conservation |
| National Water Resources Policy (Executive Decree #480 of April 23, 2013) | Environment & Conservation |
| National Environmental Supervision, Control, and Oversight Policy (Executive Decree #33 of February 26th, 2007) | Environment & Conservation |
| Regional Strategy and Action Plan for the Valuation, Protection and/or  Restoration of Key Marine Habitats in the Wider Caribbean 2021 – 2030 | Environment & Conservation |
| Strategic Action Program for the Sustainable Management of  the Shared Living Marine Resources of The Caribbean and North Brazil Shelf Large Marine Ecosystems (CLME+ Sap) | Environment & Conservation |
| Regional Action Plan for the Eastern Tropical Pacific Marine Corridor (CMAR) 2019-2024 | Environment & Conservation |
| Port State Measures Agreement (Law #43 of September 14th, 2016) | Fisheries and Aquaculture |
| Convention for the Establishment of the Aquaculture Network of the Americas (Law #80 of December 22nd, 2013) | Fisheries and Aquaculture |
| Law 204 of March 18th, 2021 | Fisheries and Aquaculture |
| Law #44 of November 23rd, 2006 | Fisheries and Aquaculture |
| Law #9 of March 16th, 2006 | Fisheries and Aquaculture |
| National Action Plan to Prevent, Discourage, and Eliminate Illegal, Unreported, and Unregulated (IUU) Fishing (Executive Decree #98-A of November 17th, 2009) | Fisheries and Aquaculture |
| National Action Plan for Sustainable Fishing (Cabinet Resolution #174 of December 20th, 2016) | Fisheries and Aquaculture |
| National Action Plan for the Management and Conservation of Sharks and Rays (Resolution #ADM/ARAP 014 of May 7th, 2018) | Fisheries and Aquaculture |
| Law #162 of September 4th, 2020 | Fisheries and Aquaculture |
| Law #17 of April 21st, 2015 | Fisheries and Aquaculture |
| Law #196 of February 8th, 2021 | Fisheries and Aquaculture |
| Law #25 of June 4th, 2001 | Fisheries and Aquaculture |
| Law #2 of March 20th, 1986 | Fisheries and Aquaculture |
| Law #4 of May 17th, 1994 | Fisheries and Aquaculture |
| Law #76 of November 23rd, 2009 | Fisheries and Aquaculture |
| National Climate Change Plan for the Agricultural Sector (Resolution OAL #059-ADM-209 of June 10th, 2019) | Fisheries and Aquaculture |
| Law Decree #7 of February 10th, 1998 | Maritime, Shipping, & Ports |
| MARPOL Convention (Law #41 of September 12th, 2016) | Maritime, Shipping, & Ports |
| Law #42 of May 2nd, 1974 | Maritime, Shipping, & Ports |
| Law #50 of June 28th, 2017 | Maritime, Shipping, & Ports |
| Law #56 of August 6th, 2008 | Maritime, Shipping, & Ports |
| Law #57 of August 6th, 2008 | Maritime, Shipping, & Ports |
| Law #8 of March 30th, 1982 | Maritime, Shipping, & Ports |
| National Maritime Strategy (Resolution JD #055a-2008 of September 18th, 2008) | Maritime, Shipping, & Ports |
| Regional Action Plan for the Development of the Interoceanic Region and for the General Use, Conservation, and Development of the Canal Zone (Law #21 for July 2nd, 1997) | Maritime, Shipping, & Ports |
| Law #2 of January 7th, 2006 | Tourism |
| Law Decree #4 of February 27th, 2008 | Tourism |
| Law #80 of November 8th, 2012 | Tourism |
| Law #9 of March 14th, 2017 | Tourism |
| Sustainable Tourism Master Plan 2020-2025 (Resolution #010/2020 of September 17th, 2020 – Cabinet Resolution #64 of May 26th, 2021) | Tourism |
| Commission for the Formulation, Development, and Oversight of Panama’s National Oceans Policy (Executive Decree #431 of October 25th, 2018) | Cross-Sectoral |
| Guidelines for Panama’s National Oceans Policy | Cross-Sectoral |
| National Oceans Policy (Executive Decree #27 of March 15th, 2022) | Cross-Sectoral |
| National Climate Change Policy (Executive Decree #35 of February 26th, 2007) | Cross-Sectoral |
| National Policy on the Integral Management of Hazardous and Non-Hazardous Materials (Executive Decree #34 of February 26th, 2007) | Cross-Sectoral |
| Nationally Determined Contribution (NDC) Report, December 2020 | Cross-Sectoral |
| National Climate Change Strategy 2050 | Cross-Sectoral |
| Biodiversity National Strategy and Action Plan 2018-2050 | Cross-Sectoral |
| National Strategy and Action Plan – Panama 2030 | Cross-Sectoral |
| National Water Security Plan | Cross-Sectoral |
| Regional Blue Growth Strategy for the Central American Integration System | Cross-Sectoral |

*Note.* Legislations listed include all subsequent amendments.

**Supplementary Table 2.**

Online sources of information and digital repositories of policy instruments.

| **Title** | **Website Address** |
| --- | --- |
| Gaceta Oficial de Panamá, Edición Digital (Official Gazette of Panama, Digital Edition) | https://www.gacetaoficial.gob.pa |
| Asamblea Nacional de Panamá (National Assembly of Panama) | https://www.asamblea.gob.pa |
| Food and Agriculture Organization of the Unites Nations FAOLEX Database | https://www.fao.org/faolex/ |
| Ministerio de Ambiente de Panamá (Ministry of Environment of Panama) | https://www.miambiente.gob.pa |
| Ministerio de Desarrollo Agropecuario de Panamá (Ministry of Agricultural Development of Panama) | https://www.mida.gob.pa |
| Ministerio de Economía y Finanzas de Panamá (Ministry of Finance and Economy of Panamá) | https://www.mef.gob.pa |
| Ministerio de Salud de Panamá (Ministry of Health of Panama) | https://www.minsa.gob.pa |
| Ministerio de Educación de Panamá (Ministry of Education of Panama) | https://www.meduca.gob.pa |
| Ministerio de Relaciones Exteriores de Panamá (Ministry of Foreign Affairs of Panama) | https://www.mire.gob.pa |
| Autoridad de Turismo de Panamá (Tourism Authority of Panama) | https://www.atp.gob.pa |
| Autoridad Marítima de Panamá (Maritime Authority of Panama) | https://www.amp.gob.pa |
| Autoridad de Aseo Urbano y Domiciliario de Panamá (Urban and Domiciliary Sanitation Authority of Panama) | https://www.aaud.gob.pa |
| Autoridad de los Recursos Acuáticos de Panamá (Aquatic Resources Authority of Panama) | https://www.arap.gob.pa |
| Secretaría Nacional de Energía de Panamá (National Energy Secretariat of Panama) | https://www.energia.gob.pa |
| Secretaría Nacional de Ciencia, Tecnología e Innovación de Panamá (National Secretariat of Science, Technology, and Innovation of Panama) | https://www.senacyt.gob.pa |
| Sistema Nacional de Información Ambiental de Panamá (National Environmental Information System of Panama) | https://www.sinia.gob.pa |
